# Supplementary material for: Can vesicle size distributions assess eruption intensity during volcanic activity?
Source: Copernicus journal article supplement (doi:10.5194/se-4-373-2013), 2013-10-18

# Supplemental figures for LaRue et al.

## Additional natural samples

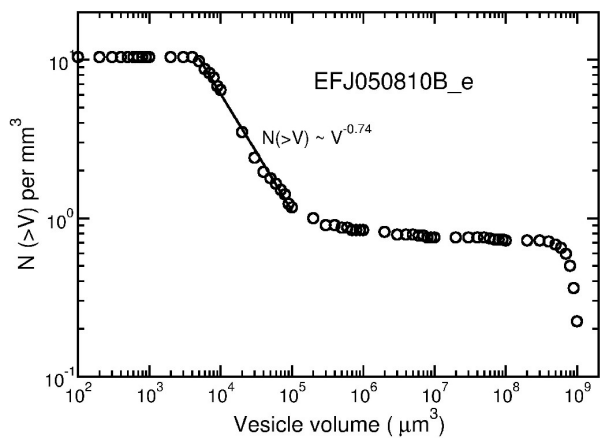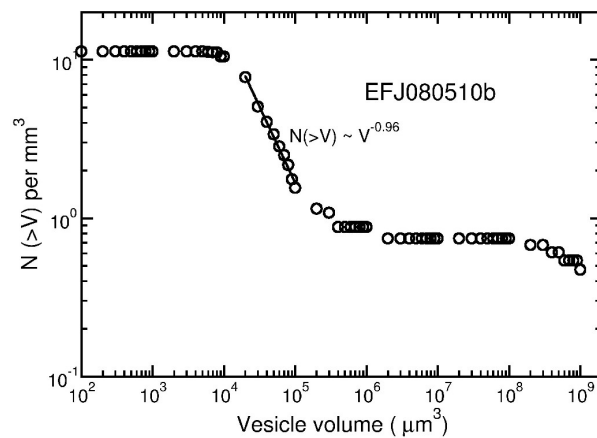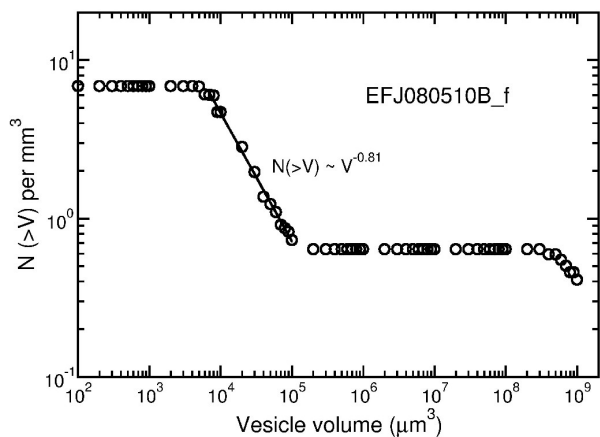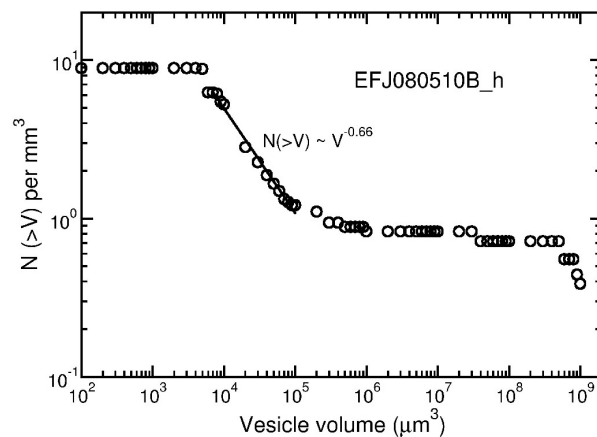

## Additional experimental results

EFJ 7a (MWI expt.)

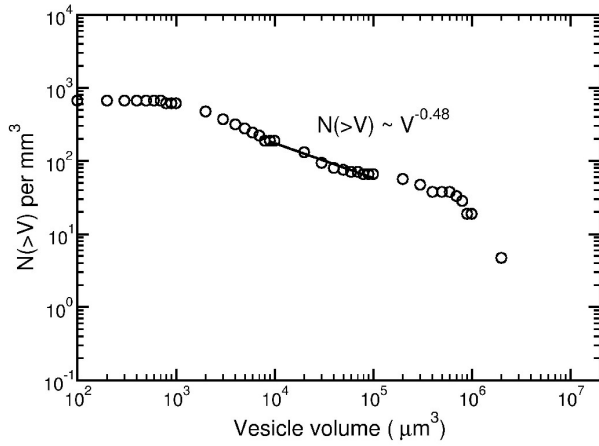

EFJ 5a (MWI expt.)

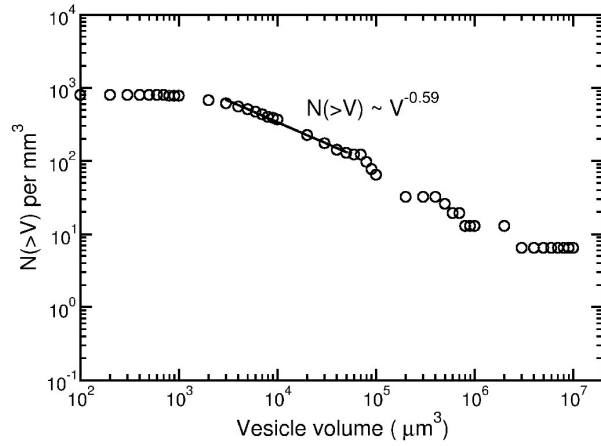

EFJ 6b (MWI expt.)

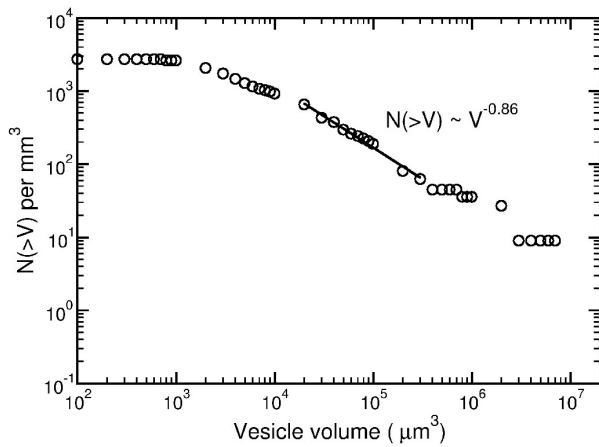

EFJ 7b (MWI expt.)

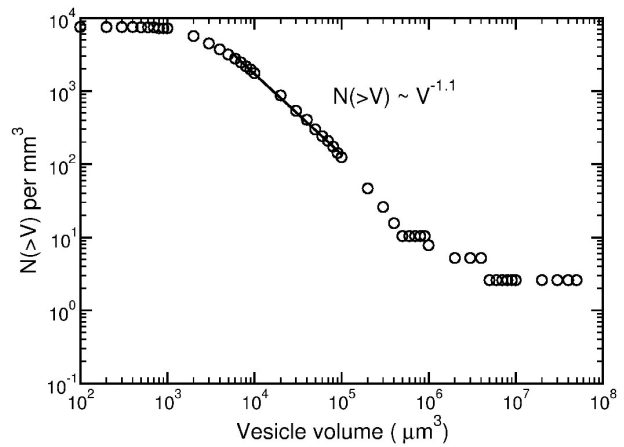

EFJ 5c (control expt.)

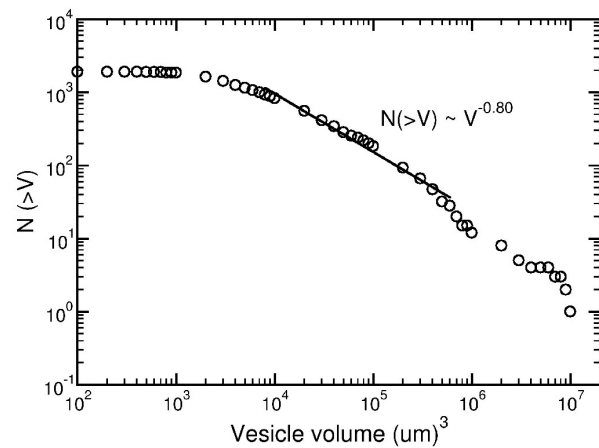

EFJ 2e (control expt.)

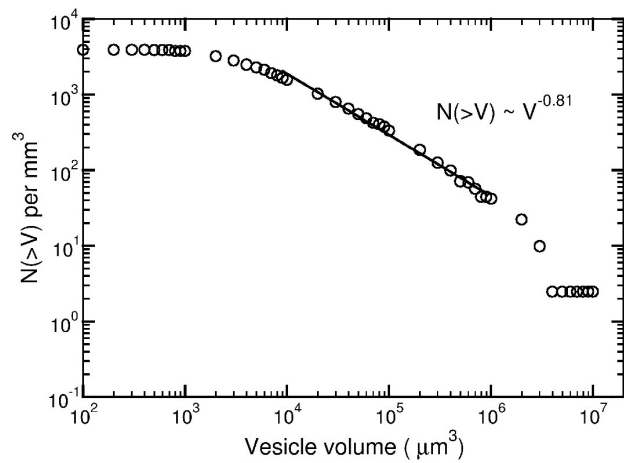

EFJ 7d (control expt.)

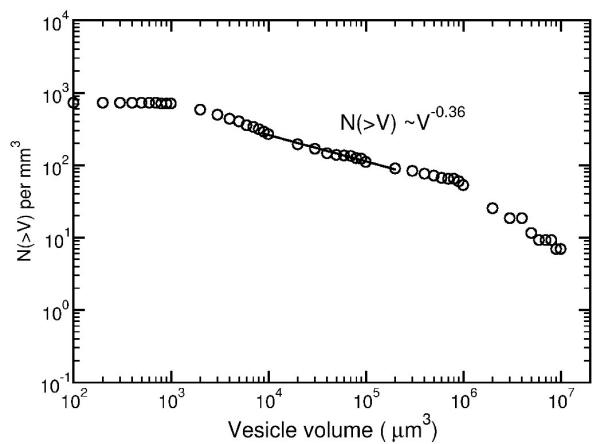

EFJ 6d (MWI expt.)

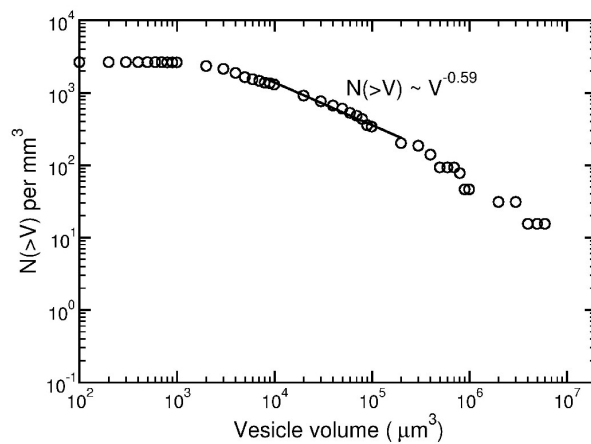

EFJ 7e (control expt.)

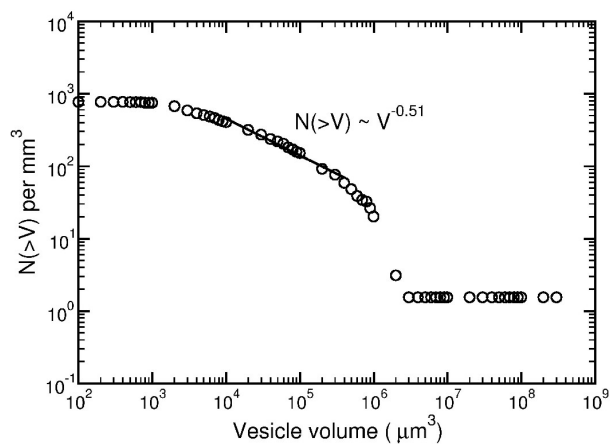

EFJ 10b (control expt.)

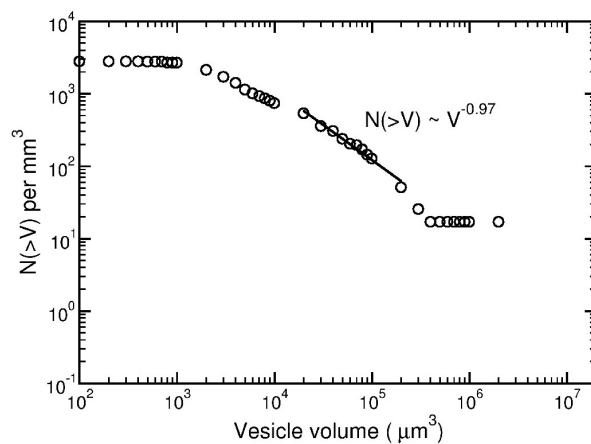

Supplement: Supplementary file 1 [file se-4-373-2013-supplement.pdf]
